# Supplementary material
Source: Springer Nature journal article supplement (https://www.springermedizin.de/resource/supplementary/12935_2009_208_MOESM6_ESM.pdf/9541376)

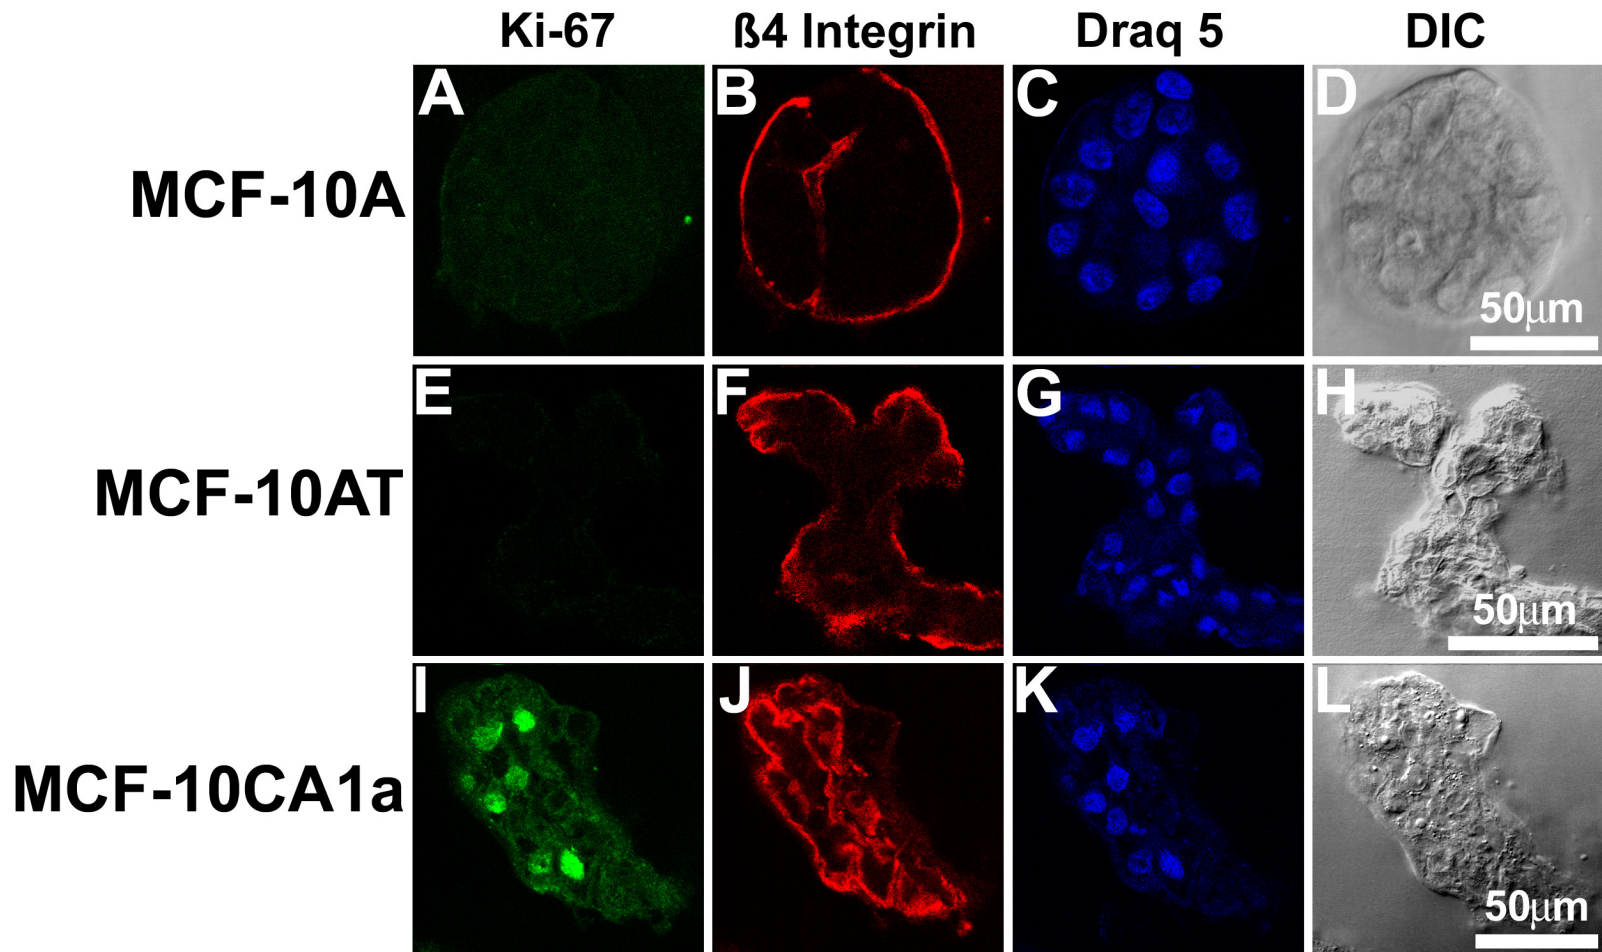

Supplement: MOESM6 [file 9541376]
